# Supplementary material
Source: Elsevier journal article supplement (https://www.sciencedirect.com/science/article/pii/S2173580820300535)
Supplement: mmc1 [file S2173580820300535:mmc1.docx]

Anexo 1. Recomendaciones nutricionales en la disfagia

| MEDIDAS GENERALES: |
| --- |

- Evite la utilización de jeringas y pajitas.

- Elija alimentos que estimulen sensorialmente como alimentos ácidos y temperaturas frías (helado de limón o de piña).

- Coma despacio en un ambiente relajado y sin prisas. El tiempo estimado es 30-60 minutos.

- No hable mientras come.

- Evite distracciones mientras come ( ver TV, hablar)

- Evite meter más alimento en la boca, si antes no ha tragado la cucharada anterior.

- Realice al menos, 5 ó 6 comidas a lo largo del día manteniendo una alimentación variada y equilibrada.

- La presión sobre la punta o laterales de la lengua con la cucharilla ayudan a estimular el reflejo de la deglución.

- Siempre que le sea posible coma usted por sí mismo, aunque supervisado por el cuidador.

- Coma cuando esté bien despierto.

- No alimente a su familiar si está adormilado o agitado.

- Mantenga una adecuada higiene de la boca, ya que estimula la secreción de saliva y mejora el sabor. Además puede prevenir la aparición de infecciones respiratorias. Lávese los dientes, encías, paladar y lengua después de cada comida.

| POSICIÓN ADECUADA |
| --- |

- Sentado, con la espalda apoyada y recta, con 90º de flexión de cadera y rodillas, los pies apoyados en el suelo o en un soporte. La espalda y la cabeza bien alineadas.

- La cabeza flexionada hacia el pecho y al tragar intente acercar lo más posible la barbilla al pecho y mirando al “ombligo”.

- Si no consigue mantener esta posición, coloque cojines para asegurar que no se inclina hacia ningún lado. Puede utilizar almohadillas hinchables para el cuello si le cuesta sostener la cabeza.

- En caso de pérdida de fuerza en una parte del cuerpo, rote la cabeza hacia ese lado y coma hacia ese lado.

- Si necesita ayuda para alimentarse, el cuidador se colocará frente a usted y a una altura por debajo de la suya para evitar que levante la cabeza al tragar.

- Evite acostarse inmediatamente después de las comidas. Manténgase sentado ó incorporado en la cama a 45º, al menos 30 minutos después de las comidas.

| SI TIENE DIFICULTAD PARA TRAGAR LÍQUIDOS |
| --- |

- Adapte la consistencia de los líquidos como le indique su médico. Las diferentes consistencias son néctar , miel o pudin.

- Néctar: Puede beberse con una pajita
- Miel: no puede tomarse con pajita pero si puede tomarse en una taza.
- Pudin: Solo puede tomarse con cuchara

- Su médico puede recetarle espesantes (están financiados). Existen de sabor neutro para añadirse a leche, caldos, infusiones o zumos colados. También los hay saborizados para mezclar con agua o zumos. Se presentan en polvo y según la cantidad que añada, conseguirá diferentes texturas

- Tenga en cuenta que los alimentos y bebidas calientes o fríos se tragan mejor que los templados.

- Consuma alimentos triturados, cremas, purés, yogur, flanes, etc. con consistencia semisólida y uniforme.

- Tenga en cuenta que las gelatinas “caseras” en la boca se transforman a líquido inmediatamente y por tanto debe evitarlas.

- Puede tomar aguas gelificadas que venden en la farmacia, que no precisan añadir espesante y están saborizadas

- **Es importante mantener un adecuado estado de hidratación, por lo que debe tomar los líquidos con el espesante y /o aguas gelificadas**

- Evite dobles texturas (líquido y sólido a la vez): alimentos con distintas consistencias (sopa caldosa con fideos, arroz, “tropezones”). Los que se desmenuzan en la boca (magdalenas, galletas). Los secos que pueden irritar la boca, la lengua o la garganta (frutos secos, pan tostado ó patatas fritas de bolsa) y los pegajosos (arroz con leche, quesitos, puré de patata).

Evite los siguientes alimentos de riesgo

- - Sopas de pasta
  - Purés con grumos o tropezones
  - Muesli, leche con cereales o galletas remojadas
  - Fibrosos: piña, alcachofa, espárragos
  - Quesos secos
  - Verduras o frutas con semillas, pepitas o piel
  - Alimentos que desprendan jugo: naranja, mandarina
  - Caramelos
  - Legumbres enteras
  - Frutos secos enteros
  - Texturas “pegajosas” (miel, chocolate, leche condensada, caramelo, dulce de leche….)
  - Alimentos densos difíciles de deglutir como patata, huevo duro, miga de pan…
  - Alimentos que puedan fraccionarse en pequeñas partículas (tostadas, galletas, bizcochos,...)

| SI TIENE DIFICULTAD PARA TRAGAR SÓLIDOS |
| --- |

- Elija alimentos blandos o triturados con textura uniforme.

- Ablande los alimentos sólidos con salsas, leche ó caldo, para conseguir una consistencia semisólida y poder tragarlos más fácilmente.

- Prepare purés variados. Evite los de patata muy densos ya que dificultan el acto de tragar (mézclelos con verduras). Puede prepararlos mezclando los primeros platos (patatas, verduras, arroz, pasta o legumbres) con los segundos (aves, carne, pescado o huevo) y añadiéndoles leche en vez de caldos.

- Triture los alimentos en el momento de tomarlos siempre que pueda. Evite añadir más líquido del necesario al triturar, porque al diluir reducirá el valor nutricional del alimento.

- Cuide que los triturados de frutas, verduras, legumbres, carne y pescado, no tengan residuos como espinas, huesitos, pepitas, semillas o pieles. Y una vez triturados, páselos por el pasapuré.

- Si presenta sequedad de boca, tome una pequeña cantidad de agua fría y alimentos y bebidas ácidos (limón, vegetales en vinagre, etc.) antes de las comidas para estimular la secreción de saliva y mantener una óptima hidratación. Si el problema es un exceso de formación de mucosidad, evite los alimentos muy dulces y los zumos cítricos, ya que aumentan y espesan la saliva.
